# Supplementary material for: The G2019S variant of leucine-rich repeat kinase 2 (LRRK2) alters endolysosomal trafficking by impairing the function of the GTPase RAB8A
Source: PubMed Central journal article supplement (PMC6442034; doi:10.1074/jbc.ra118.005008), 2019-02-01
Supplement: supp_RA118.005008_139592_2_supp_277358_pm4kbz.pdf [file supp_RA118.005008_139592_2_supp_277358_pm4kbz.pdf]

## Supplementary Figures

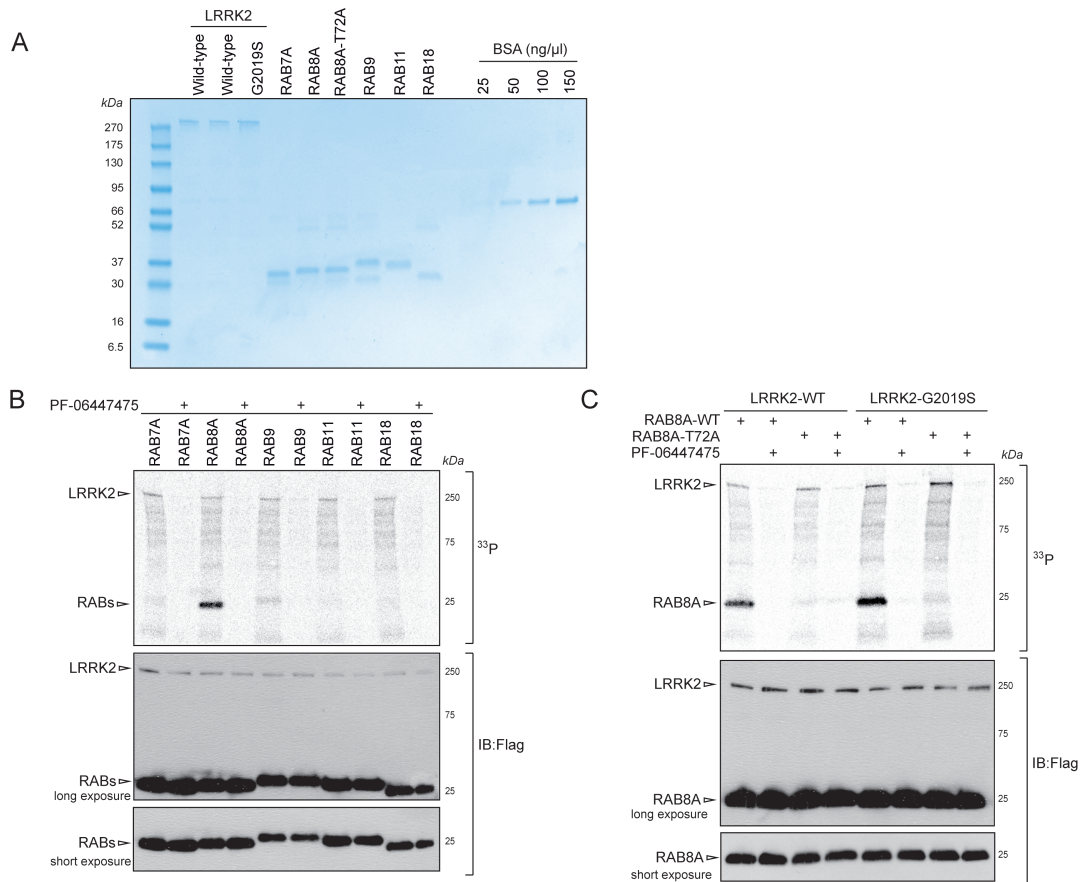

**Fig. S1.** LRRK2 phosphorylates RAB8A but not endolysosomal RAB7A/RAB9 proteins.

(A) Representative Coomassie blue stained SDS-PAGE of purified 3x-flag-tagged LRRK2 or 3x-flag-tagged RAB proteins after 3xflag peptide elution. Protein concentration was estimated by a calibration curve with BSA standards of known concentrations. (B) *In vitro* radioactive kinase assays of 3x-flag-tagged wildtype LRRK2 and 3x-flag-tagged RAB7A, RAB8A, RAB9, RAB11 or RAB18, purified from

HEK293T cells (1:10 ratio of LRRK2:Rab proteins). Incorporated radioactivity was revealed by phosphoscreen (upper panel), and total protein loading by anti-flag (IB:Flag) immunoblotting (lower panel). LRRK2 kinase inhibitor PF 06447475 was used at 1  $\mu$ M to confirm LRRK2-specific phosphorylation. (C) *In vitro* radioactive kinase assays of 3x-flag-tagged wildtype or G2019S LRRK2 in the presence of either 3x-flag-tagged wildtype RAB8A or phosphodeficient RAB8A-T72A as indicated. Incorporated radioactivity was revealed by phosphoscreen (upper panel), and total protein loading by anti-flag (IB:Flag) immunoblotting (lower panel). LRRK2 kinase inhibitor PF 06447475 was used at 1  $\mu$ M to confirm LRRK2-specific phosphorylation.



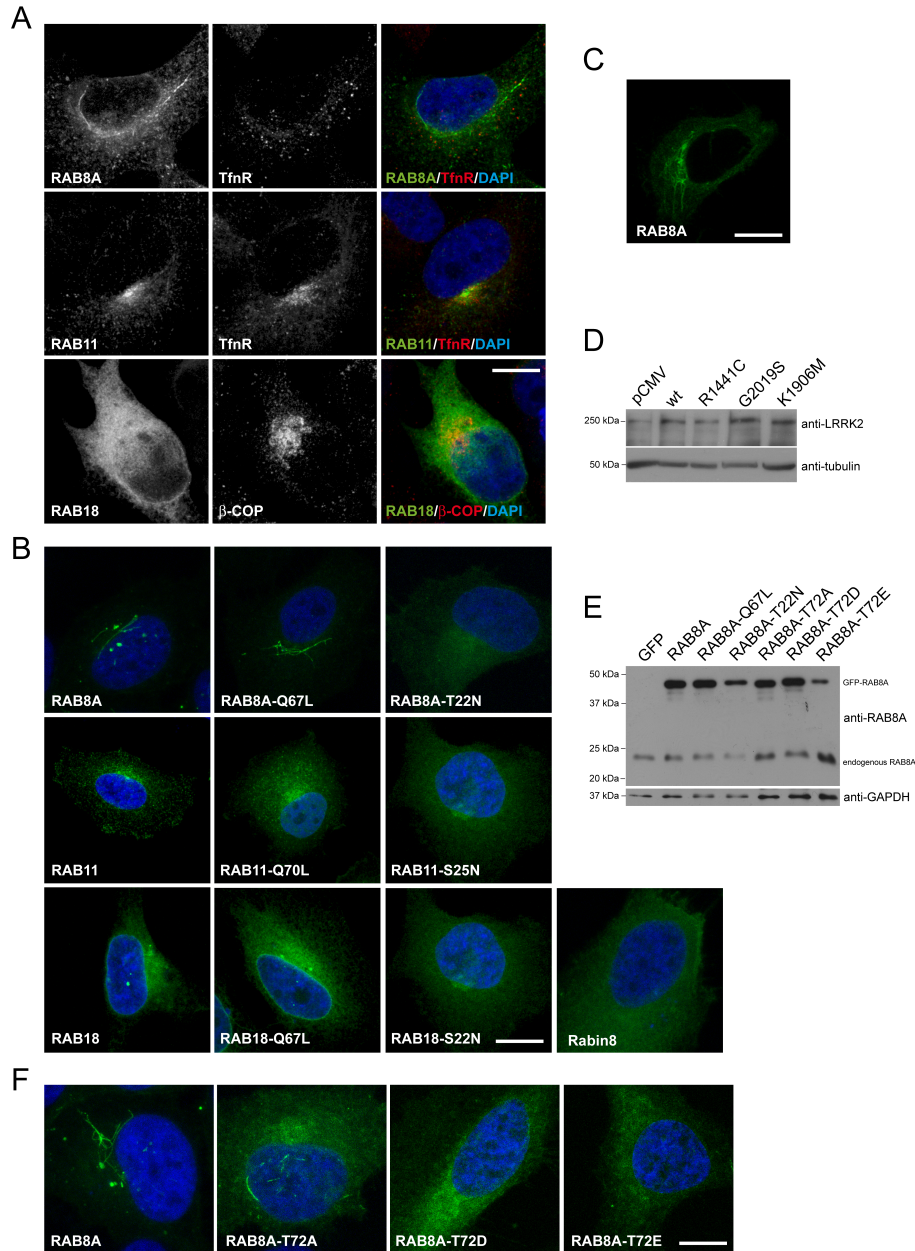

**Fig. S2.** Subcellular localization and expression levels of different RAB proteins. **(A)** HeLa cells were transfected with GFP-tagged RAB constructs as indicated, and stained with antibodies against a marker for endolysosomes (LAMP1), endocytic recycling compartment (TfnR) or trans-Golgi ( $\beta$ -COP). Scale bar, 10  $\mu$ m. **(B)** HeLa cells were transfected with GFP-tagged RAB constructs as indicated. To maintain proper membrane

association of the different RAB proteins, cells were fixed but only briefly permeabilized before mounting with DAPI. Scale bar, 10  $\mu\text{m}$ . (C) Individual z-stack of live HeLa cell transfected with GFP-RAB8A. Scale bar, 10  $\mu\text{m}$ . (D) HeLa cells were transfected with either empty vector (pCMV) or the indicated GFP-tagged LRRK2 constructs, and cell extracts (30  $\mu\text{g}$ ) analyzed by Western blotting for LRRK2 protein levels, and for tubulin as loading control. (E) HeLa cells were transfected with either GFP, or GFP-tagged RAB8A constructs as indicated, and cell extracts (30  $\mu\text{g}$ ) analyzed by Western blotting for RAB8A, and for GAPDH as loading control. (F) Example of HeLa cells transfected with the indicated GFP-tagged RAB8A variants, fixed and mounted with DAPI (blue). Scale bar, 10  $\mu\text{m}$ .

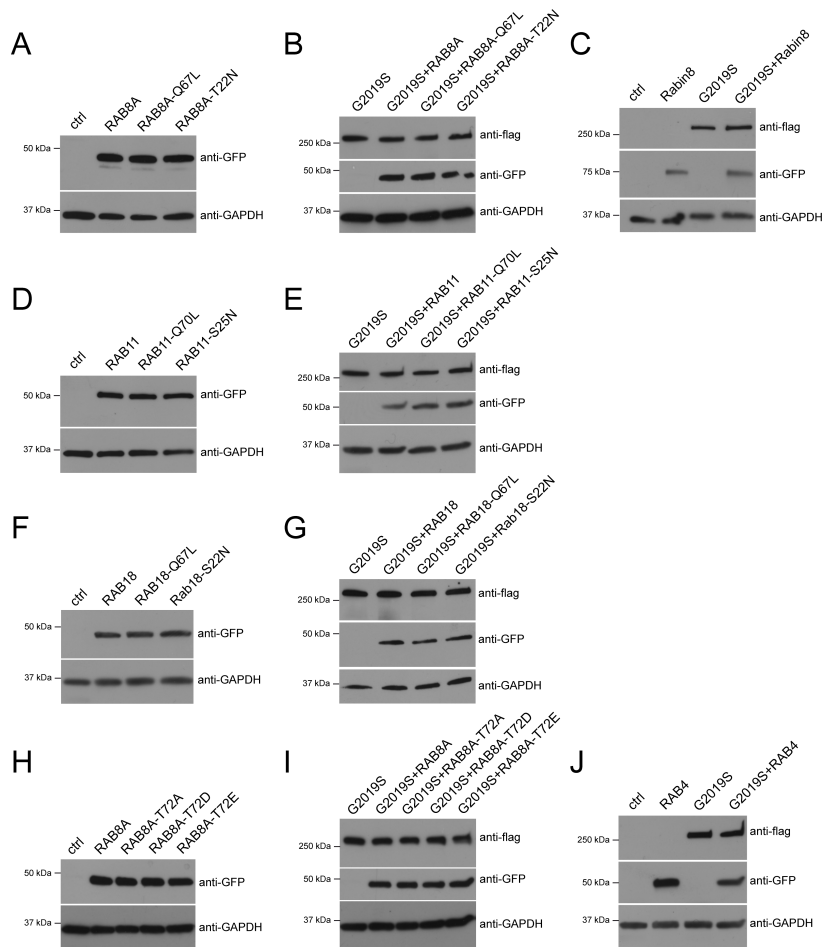

**Fig. S3.** Expression and co-expression levels of various RAB proteins with G2019S LRRK2. (A) HeLa cells were transfected with GFP-tagged RAB8A constructs as indicated, and cell extracts (30  $\mu$ g) analyzed by Western blotting for GFP, and for GAPDH as loading control. (B) HeLa cells were transfected with flag-G2019S along with the indicated GFP-tagged RAB8A constructs as indicated, and cell extracts (30  $\mu$ g) analyzed by Western blotting for flag, GFP, and for GAPDH as loading control. (C) HeLa cells were transfected with GFP-tagged Rabin8, flag-G2019S, or co-transfected as indicated, and cell extracts (30  $\mu$ g) analyzed by Western blotting for flag, GFP, and for GAPDH as loading control. (D) Same as (A), but cells transfected with GFP-tagged

RAB11 constructs as indicated. **(E)** Same as (B), but cells co-transfected with flag-G2019S and the GFP-tagged RAB11 constructs as indicated. **(F)** Same as (A), but cells transfected with GFP-tagged RAB18 constructs as indicated. **(G)** Same as (B), but cells co-transfected with flag-G2019S and GFP-tagged RAB18 constructs as indicated. **(H)** Same as (A), but cells transfected with GFP-tagged RAB8A constructs as indicated. **(I)** Same as (B), but cells co-transfected with flag-G2019S and GFP-tagged RAB8A constructs as indicated. **(J)** Cells were transfected with GFP-tagged RAB4, flag-G2019S, or co-transfected as indicated, and cell extracts (30  $\mu$ g) analyzed by Western blotting for flag, GFP, and for GAPDH as loading control.

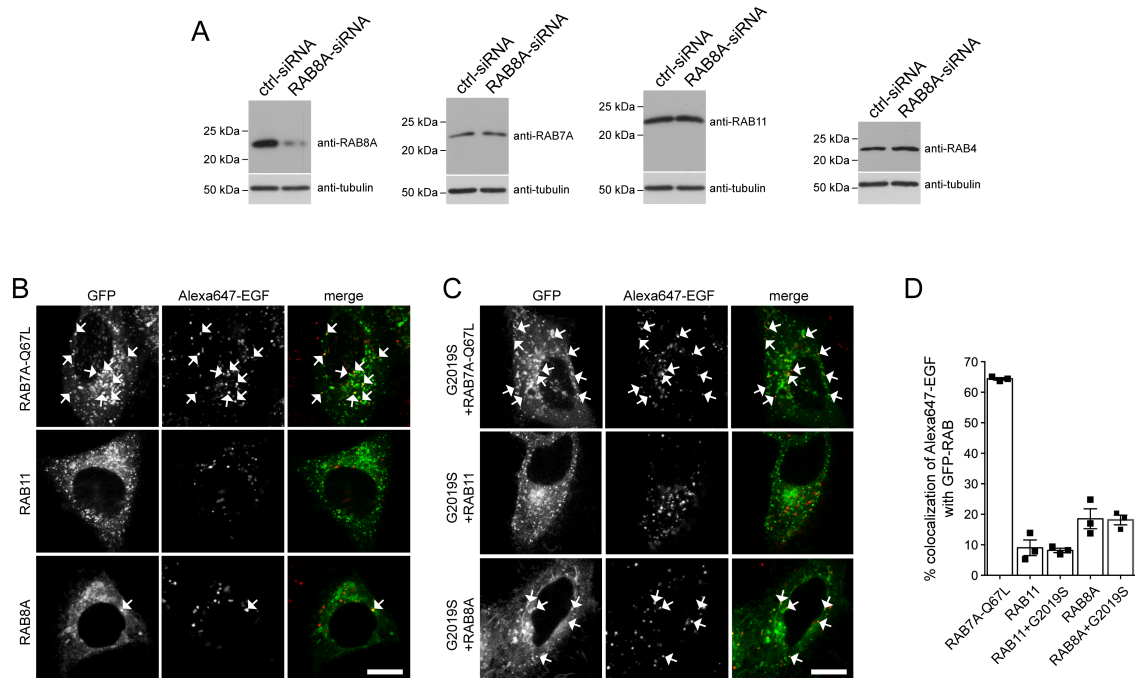

**Fig. S4.** Specificity of RAB8A knockdown, and lack of Alexa647-EGF accumulation in RAB8A- or RAB11-positive compartments. **(A)** HeLa cells were treated with ctrl-siRNA or RAB8A-siRNA, and extracts subjected to Western blotting against various RAB proteins as indicated. **(B)** Cells were transfected with GFP-tagged RAB proteins as indicated, loaded with Alexa647-EGF for 20 min and followed by live imaging. Arrows indicate colocalization. Scale bar, 10  $\mu$ m. **(C)** Cells were transfected with GFP-tagged RAB proteins and G2019S LRRK2 as indicated, loaded with Alexa647-EGF for 20 min followed by live imaging. Arrows indicate colocalization. Scale bar, 10  $\mu$ m. **(D)** Quantification of colocalization of Alexa647-EGF with GFP-tagged RAB proteins in the absence or presence of G2019S LRRK2 as indicated (Manders coefficient 1 x 100). N=3 independent experiments.

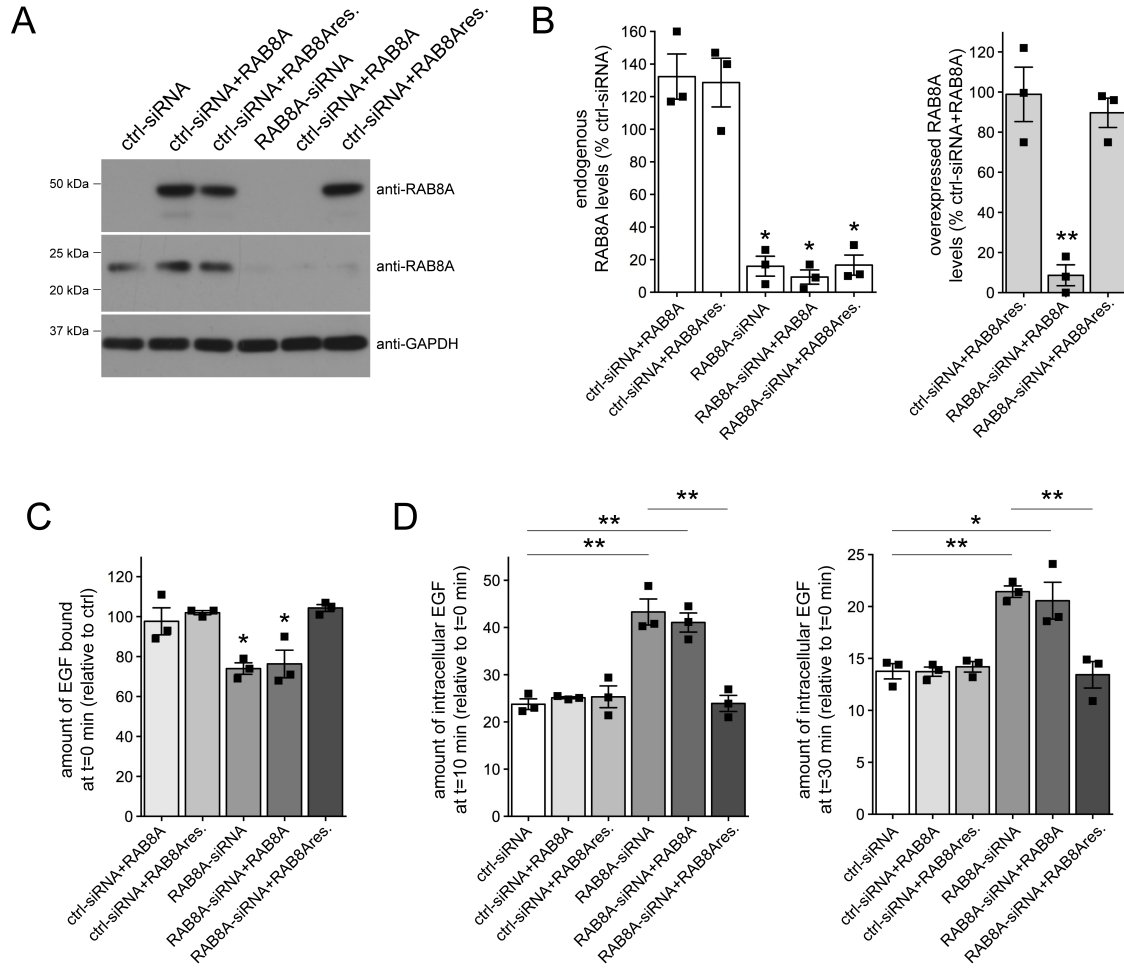

**Fig. S5.** siRNA-resistant RAB8A variant rescues the G2019S LRRK2-mediated endolysosomal trafficking deficits. **(A)** HeLa cells were either transfected with ctrl-siRNA or RAB8A-siRNA, and either with wildtype mRFP-RAB8A (RAB8A) or an siRNA-resistant version of mRFP-RAB8A (RAB8res.), and cell extracts (30  $\mu$ g) analyzed by Western blotting for mRFP-RAB8A levels, endogenous RAB8A levels and GAPDH as loading control. **(B)** Quantification of the type of experiments depicted in (A). Endogenous RAB8A levels (left) were normalized to levels in the presence of ctrl-siRNA, and overexpressed mRFP-RAB8A levels (right) normalized to levels in the presence of ctrl-siRNA and wildtype RAB8A (RAB8A). N=3 independent experiments.

\*P < 0.05; \*\*P < 0.01. **(C)** Cells were either transfected with ctrl-siRNA or RAB8A-siRNA in the presence or absence of wildtype or siRNA-resistant mRFP-RAB8A as indicated, and surface-bound fluorescent Alexa488-EGF quantified. N=3 independent experiments. \*P < 0.05. **(D)** Cells were either transfected with ctrl-siRNA or RAB8A-siRNA in the presence or absence of wildtype or siRNA-resistant mRFP-RAB8A as indicated, followed by quantification of internalized fluorescent Alexa488-EGF at 10 min (left) and 30 min (right). N=3 independent experiments. \* P < 0.05; \*\* P < 0.01.
